# ***Serratia marcescens* secretes proteases and chitinases with larvicidal activity against *Anopheles dirus***

Natapong Jupatanakul<sup>1,\*</sup>, Jutharat Pengon<sup>1</sup>, Shiela Marie Gines Selisana<sup>2#</sup>, Waeowalee Choksawangkar<sup>3</sup>, Nongluck Jaito<sup>4</sup>, Atiporn Saeung<sup>5</sup>, Ratchanu Bunyong<sup>1</sup>, Navaporn Posayapisit<sup>1</sup>, Khongkhwan Thammatinna<sup>6</sup>, Nuttiya Kalpongkukul<sup>7,8</sup>, Kittipat Aupalee<sup>5</sup>, Trairak Pisitkun<sup>8</sup> and Sumalee Kamchonwongpaisan<sup>1</sup>

<sup>1</sup> Protein-Ligand Engineering and Molecular Biology Research Team, National Center for Genetic Engineering and Biotechnology (BIOTEC), National Science and Technology Development Agency (NSTDA), Pathumthani, Thailand

<sup>2</sup> Institute of Biological Sciences, College of Arts and Sciences, University of the Philippines Los Baños, Laguna, Philippines

<sup>3</sup> Department of Biochemistry, Faculty of Science, Burapha University, Chonburi, Thailand

<sup>4</sup> Enzyme Technology Research Team, National Center for Genetic Engineering and Biotechnology (BIOTEC), National Science and Technology Development Agency (NSTDA), Pathumthani, Thailand

<sup>5</sup> Department of Parasitology, Faculty of Medicine, Chiang Mai University, Chiang Mai, Thailand

<sup>6</sup> Department of Biology, Faculty of Science, Prince of Songkla University, 15 Karnjanavanich Rd., Hat Yai, Songkhla, Thailand

<sup>7</sup> Inter-Department Program of Biomedical Sciences, Faculty of Graduate, Chulalongkorn University, Bangkok, Thailand

<sup>8</sup> Center of Excellence in Systems Biology, Faculty of Medicine, Chulalongkorn University, Bangkok, Thailand

\*Corresponding author: Email: [natapong.jup@biotec.or.th](mailto:natapong.jup@biotec.or.th)

#Current address: School of Life Science and Technology, Tokyo Institute of Technology, Nagatsuta-cho, Midori-ku, Yokohama, Kanagawa 226-8501, Japan.

## ABSTRACT

Vector control, the most efficient tool to reduce mosquito-borne disease transmission, has been compromised by the rise of insecticide resistance. Recent studies suggest the potential of mosquito-associated microbiota as a source for new biocontrol agents or new insecticidal chemotypes. In this study, we identified a strain of *Serratia marcescens* that has larvicidal activity against *Anopheles dirus*, an important malaria vector in Southeast Asia. This bacterium secretes heat-labile larvicidal macromolecules when cultured under static condition at 25°C but not 37°C. Two major protein bands of approximately 55 kDa and 110 kDa were present in spent medium cultured at 25°C but not at 37°C. The Liquid Chromatography-Mass Spectrometry (LC-MS) analyses of these two protein bands identified several proteases and chitinases that were previously reported for insecticidal properties against agricultural insect pests. The treatment with chitinase and protease inhibitors led to a reduction in larvicidal activity, confirming that these two groups of enzymes are responsible for the macromolecule's entomopathogenicity. Taken together, our results suggest a potential use of these enzymes in the development of larvicidal agents against *Anopheles* mosquitoes.

**Keywords:** *Anopheles*; microbiota; larvicidal; mass spectrometry; entomopathogen

## 1. Introduction

Aside from nuisances, mosquitoes are vectors of a wide range of human pathogens including *Plasmodium* parasites that cause malaria, filarial nematodes and viruses such as dengue, Zika, yellow fever, and chikungunya. These pathogens cause diseases that are major public health and economical burdens causing approximately 500,000 deaths each year (Shaw and Catteruccia, 2019), with malaria alone accounting for 90% of the deaths. *Anopheles dirus* has been incriminated as the primary vectors of the malarial protozoa *P. falciparum* and *P. vivax* in Southeast Asia (Manguin et al., 2008). Although malaria cases and disease burden have significantly decreased over the past decades owing to an extensive effort in mosquito control and antimalarial drug treatment, malaria elimination faces obstacles such as the increasing insecticide resistance of mosquitoes as well as the emergence of antimalarial drug resistance of *Plasmodium* parasites (Whitty and Ansah, 2019). While there are several new classes of antimalarial drugs in the clinical pipelines (“MMV-supported projects | Medicines for Malaria Venture,” 2020; Wells et al., 2015), insecticides with new mode of action are much less developed (Shaw and Catteruccia, 2019; Whitty and Ansah, 2019).

Mosquitoes live in constant interactions with microorganisms in their environment and throughout their life cycle (Gendrin and Christophides, 2013; Wang et al., 2011), and in particular, the aquatic stages of the mosquito larvae because they are submerged in water (Dickson et al., 2017). Although microbiota is needed for the healthy development of the mosquito larva (Chouaia et al., 2012; Coon et al., 2014; Dickson et al., 2017; Valzania et al., 2018), certain microbes can be pathogenic to them (Baumann et al., 1991; Laurence et al., 2011). These entomopathogenic microorganisms, such as *Bacillus thuringiensis* and *Bacillus sphaericus* or their by-products, have long been used for mosquito population control (Baumann et al., 1991; Laurence et al., 2011). In addition to these *Bacillus* species, recent studies have identified entomopathogenic bacteria from the mosquito gut microbiota such as *Chromobacterium* spp. and *Serratia marcescens* (Bahia et al., 2014; Ramirez et al., 2014; Short et al., 2018). *Chromobacterium* spp. isolated from the mosquito gut from Panama (*Csp\_P*) has insecticidal properties and has potential to be developed as a mosquito larvicide

agent (Caragata et al., 2020). This suggests that the natural microbial communities associated with mosquitoes are invaluable resources for the discovery of biocontrol agents with new mode of actions and the development of novel insecticides.

In this study, we isolated and identified culturable bacteria with distinct morphology from the *An. dirus* larval rearing pan where larval death was being observed. Of seven isolates, we found a strain of *Serratia marcescens* that secreted heat-labile larvicidal macromolecules into spent medium when it was cultured under static condition at 25°C. We then used mass spectrometry to identify chitinases and proteases as potential larvicidal molecules. Chitinase and protease inhibitors were then used to confirm that these molecules contributed to larvicidal activity. This study demonstrates that the chitinases and proteases uncovered in this study could potentially be used as larvicides against *Anopheles* mosquito.

## 2. Materials and Methods

### 2.1 Ethics statement

Animal works in this study were carried out in accordance to the recommendations provided in the Guide for the Care and Use of Laboratory Animals of the National Institutes of Health. Mice were used only as a blood source for mosquito rearing, according to the protocol (BT-Animal 26/2560). Larvicidal activity assays were performed following the approved protocol (BT-Animal 20/2560). Both animal protocols were approved by the BIOTEC Committee for use and care of laboratory animals.

### 2.2 Mosquito rearing condition

Specimens of laboratory strain of *An. dirus* were originally collected in Mae Sod District, Tak Province, Thailand. A colony of *An. dirus* was maintained at the Department of Parasitology, Chiang Mai University and BIOTEC's insectary at 27 °C with 75% humidity and a 12-h day/night, 30-min dusk/ dawn lighting cycle. The larvae were fed a diet of powdered

fish food (Tettabit, Germany). Adults were fed on a 10% sucrose solution supplemented with 5% multivitamin syrup (Sevensseas, UK) *ad libitum* (Choochote and Saeung, 2013).

### 2.3 Bacterial isolation and identification

Bacteria were isolated from two biological niches, larval rearing water and bacterial biofilm at the bottom of the rearing pan. The rearing water was 10-fold serially diluted with sterile 1X Phosphate buffered saline (PBS). The biofilm was gently rinsed five times with 1X PBS then the biofilm was scraped with sterile plastic scraper, resuspended with 20 mL of sterile PBS then 10-fold serially diluted. The serial dilutions were then plated on Luria-Bertani (LB) and incubated at room temperature for 2 days. Bacterial colonies with distinct morphologies from each ecological niche were then streaked on LB agar plate. A single colony from each bacterial isolate was then propagated and used for molecular identification using 16s rRNA gene. Briefly, a colony of each isolate was resuspended in 50 µL of sterile water then 1 µL of resuspended bacteria was used in a PCR reaction using Phusion® High-Fidelity DNA Polymerase (New England Biolabs) with forward (16s-8F: 5' AGAGTTTGATCCTGGCTCAG 3') and reverse (16s-1492R: 5' CGGTTACCTTGTTACGACTT3') primers (Eden et al., 1991). PCR amplification was performed with an initial denaturation of 2 minutes 30 seconds at 98°C, followed with 30 cycles of denaturation at 98°C for 10 seconds, annealing at 52°C for 15 seconds and an extension at 72°C for 1 minute. The amplicons were then purified using QIAquick PCR purification kit then submitted for Sanger DNA sequencing. The obtained bacterial 16s rRNA gene sequences from the forward and reverse primers were manually trimmed and assembled. The assembled sequences were then searched on the NCBI's Basic Local Alignment Search Tool (BLAST, <https://blast.ncbi.nlm.nih.gov/Blast.cgi>) (Altschul et al., 1990).

### 2.4 Bacteria culture and bacterial spent media preparation

All isolated bacteria were cultured in LB medium under specific conditions as mentioned for each experiment. To start a culture, a colony of each bacterium was inoculated in 10 mL of LB medium then cultured at 25°C, 200 rpm overnight. The absorbance at 600 nm

(OD<sub>600</sub>) was measured for the overnight culture, then 1 mL of culture at OD<sub>600</sub> = 1 was inoculated into 5 mL of fresh LB medium. For static culture, 18 mL of inoculated culture was added to a 90 mm diameter petri dish then incubated without shaking at specified temperature. For planktonic culture, 18 mL of inoculated culture was added to a 50 mL conical tube then agitated at 200 rpm at specified temperature. After incubation, bacterial cells were removed from the spent media by centrifugation at 4500 rpm 4 °C for 45 minutes. Supernatants were then filtered through 0.22 µm syringe filter (Sartorius). The sterile spent media were then kept at 4 °C until further use.

## 2.5 Characterization of physical property of secreted larvicidal molecules

We first evaluated whether the secreted larvicidal molecules were proteins (macromolecules) or small molecules because they would require different methods of identification. Thus, the larvicidal molecules were characterized based on the heat stability and molecular weight.

The heat stability of the secreted larvicidal molecules was determined by heating the spent media at 45, 70, and 95 °C for one hour. Heated spent media were then used to test for remaining larvicidal activity.

Proteins (macromolecules) and small molecules were separated using Amicon® Ultra-4 10K Centrifugal Filter Device following the manufacturer's instructions. Briefly, 4 ml of spent media were added to the filter unit then centrifuged at 1500xg, 4 °C for 30 minutes. The flow through was collected as small molecule fraction while the molecules retained on the filter device were resuspended in LB medium or PBS to dilution factors as indicated in each experiment then used as macromolecule fraction.

## 2.6 Larvicidal activity assay

Instar 2 stage larvae of *An. dirus* were filtered and rinsed twice with 250 mL sterile distilled water. Larvicidal assays were performed with 20 mosquitoes in 4 mL of total water volume per treatment per replicate in each well of 6-well plate. Filtered bacteria spent media

were added to each well at 10% v/v and mortality was recorded for 72 hours. For the group with antibiotics treatment, Penicillin/Streptomycin solution (Gibco) were added to the well at final concentration of 100 U/mL and 100 µg/mL, respectively. For *Pseudomonas* spp. challenge, the bacterium was cultured overnight at 25 °C then the cells were collected by centrifugation at 1500xg, 4 °C for 15 minutes. Bacterial cells were then washed twice with 1X PBS, diluted then added to larvicidal plate at a concentration as specified in the results section.

## 2.7 Cytotoxicity in C6/36 insect cell line

Cytotoxicity of *S. marcescens* spent medium in insect cell line was determined by sulforhodamine B (SRB) assay according to previously published protocol (Vichai and Kirtikara, 2006) with slight modification for C6/36 cell line. The SRB assay measured cellular protein content to determine cell survival after spent medium treatment. Briefly, C6/36 cells were seeded into each well of 96-well plate at 30,000 cells/well in 100 µl of 10% (v/v) *S. marcescens* spent medium in complete L15 medium (L15 supplemented with 10% Fetal bovine serum, 1% MEM non-essential amino acids, 2% Tryptose phosphate broth, 100 U/mL Penicillin and 100 µg/mL Streptomycin) and incubated at 28 °C for 72 hours. After incubation, cell monolayers were fixed with 10% (w/v) trichloroacetic acid for 45 minutes at 4 °C and rinsed 4 times with tap water. Fixed cell monolayer was then stained with 0.057% (w/v) SRB in 1% acetic acid for 30 minutes at room temperature in the dark. Stained cell monolayers were then washed with 100 µl 1% acetic acid for four times to remove unbound dye. To solubilize protein-bound SRB, 200 µl of 10 mM Tris (pH 10.5) was added to each well then the plate was shaken for 30 minutes at room temperature. Absorbance at 510 nm was then measured in a microplate reader to determine cell viability. LB was used as an untreated control and 5 µM cycloheximide was used as a positive control of the cytotoxicity assay.

## 2.8 In-gel digestion of secreted *S. marcescens* macromolecules for LC-MS/MS analysis

The cell-free macromolecules of *S. marcescens* static culture at 25 and 37 °C were mixed with Laemmli buffer, denatured at 95 °C for 10 minutes then subjected to SDS-PAGE.

After the SDS-PAGE fractionation, protein bands present in the 25 but not in 37 °C culture condition were excised from the gel for in-gel tryptic digestion followed by LC-MS/MS analyses (Shevchenko et al., 2007). Briefly, the gel bands were excised and dehydrated in 100% acetonitrile. Proteins were reduced by 10 mM dithiothreitol at 56°C for 30 min and alkylated by 20 mM chloroacetamide at room temperature for 20 min. The gel bands were further destained using 50 mM  $\text{NH}_4\text{HCO}_3$  in 50% acetonitrile for 30 min, followed by dehydration in neat acetonitrile. Digestion was carried out by adding 13 ng/ $\mu\text{L}$  trypsin in 50 mM  $\text{NH}_4\text{HCO}_3$  to cover the gel pieces, and the reaction was incubated at 37°C overnight. Extraction of cleaved peptides was performed by adding extraction buffer (70% acetonitrile/1% formic acid) to the digests at the ratio of 2:1 (v/v). Then the extracts were lyophilized and redissolved in 0.1% formic acid ready for LC-MS/MS analyses.

## 2.9 LC-MS/MS analyses of secreted *S. marcescens* macromolecules

The digested peptides (200 ng) were analyzed by an EASY-nLC 1000 HPLC system (Thermo Fisher Scientific) interfaced with a Q Exactive™ Hybrid Quadrupole-Orbitrap mass spectrometer (Thermo Fisher Scientific) via an EASY-Spray ion source (Thermo Fisher Scientific). The separation was performed for 60 min at the flow rate of 300 nL/min using C18-reverse phase column (EASY-Spray™, Thermo Fisher Scientific). The stepwise gradient was set from 5% solvent B (0.1% formic acid in acetonitrile)/ 95% solvent A (0.1% formic acid in  $\text{H}_2\text{O}$ ) to 20% solvent B/ 80% solvent A for 43 min and then to 40% solvent B within the next 10 min, followed by holding at 95% for 55 - 60 min. Data-dependent acquisition was performed wherein the ten most abundant precursor ions were selected for fragmentation. The precursor masses were scanned by the Orbitrap mass analyzer at the mass range of 400 – 1600 m/z and the resolution of 70,000. Higher-energy collisional dissociation was employed for fragmentation with an exclusion of +1 charged ions. All data were acquired using Thermo Xcalibur 2.2 software.



Mass spectra were searched against NCBI database of *Serratia* sp. (August, 2018) using Proteome Discoverer 2.2 connected to SEQUEST search engine (Eng et al., 1994). Precursor mass tolerance was set to 10 ppm and the product ion mass tolerance was 0.02 Dalton. Trypsin was specified with maximum 2 missed cleavages. Carbamidomethylation was chosen as a fixed modification; while oxidation of methionine was allowed as variable modification. Decoy search was performed using the false discovery rate of 0.01 as a threshold.

## 2.10 Chitinase activity assay

Chitinase activity of spent medium was determined by measuring the ability of the spent medium to digest chitin into a reducing sugar, *N*-acetyl-*D*-glucosamine. To set up the chitinase activity assay, 100 µL of cell-free spent culture media served as a crude enzyme source was mixed with 100 µL of 1% (w/v) chitin powder (Sigma, USA) in 50 mM sodium phosphate buffer (pH 6.5). The reaction mixture was incubated at 30°C for 90 min. The amount of reducing sugar was then determined by using *p*-hydroxybenzoic acid hydrazide (pHBAH) assay (Lever, 1972). A stock solution of 5% (w/v) pHBAH (Sigma, USA) was prepared in acid medium (0.5 M HCl) and diluted at the moment of analysis to 1% (w/v) in alkaline medium (0.5 M NaOH). Samples were mixed with 1% (w/v) pHBAH in alkaline solution (0.5 M NaOH) at a ratio of 1:3 and the mixture was heated in the boiling bath for 5 min to develop the color. After cooling, the solution was centrifuged at 12,000 rpm for 2 min. The absorbance at 410 nm of the supernatant was then measured using spectrophotometer. *N*-acetyl-*D*-glucosamine standard solution was prepared in the same manner at concentrations of 0, 0.2, 0.4, 0.6, 0.8, and 1 mg/ml in distilled water. One unit of enzyme activity was defined as the amount of enzyme which releases 1 µg of reducing sugar per hour under the assay conditions.

## 2.11 Statistical analyses

Statistical significance of the survival analyses was calculated using Log-rank test followed by a Bonferroni post-hoc analysis using ‘survminer’ package (Kassambara et al., 2019) in R (R Core Team, 2020).

Statistical analysis comparing chitinase activity level and inhibition of chitinase activity was performed using One-way ANOVA with Tukey multiple comparison test using multcompView (Graves and Dorai-Raj, 2019) package in R (R Core Team, 2020).

### 3. Results

#### 3.1 Isolation of bacteria from *An. dirus* larval rearing pan

Our laboratory has recently set up a new insectary facility to expand our drug development pipeline to test antimalarial compounds against sexual stage of *Plasmodium* parasites. During the optimization of *Anopheles dirus* rearing condition, we found that if the larval food particle size was not fine enough, the food sedimented to the bottom of the pan. Due to the surface feeding nature of *An. dirus*, the sedimented food led to a bacterial growth and biofilm at the bottom of the pan. Mortality of the mosquito larva was observed a few days after the biofilm formed at the bottom of the pan. From this observation, we hypothesized that certain microbes in the larval rearing pan secrete molecule(s) that have larvicidal activity against *An. dirus*.

A total of seven bacteria species were isolated and identified from the rearing pan by 16s rRNA gene sequencing. These include one Actinobacteria: *Leucobacter* spp. (Leu\_spp), two Bacteroidetes: *Sphingobacterium* spp. (Sph\_spp) and *Sphingobacterium multivorum* (Sch\_m); and four proteobacteria: *Acinetobacter soli* (Aci\_s), *Ochrobactrum* spp. (Och\_spp), *Serratia marcescens* (Ser\_m), and *Stenotrophomonas maltophilia* (Ste\_m) as summarized in Table 1.

Table 1. Bacterial isolates from *An. dirus* larval rearing pan identified by 16s rRNA gene sequencing

| Abbreviation | Species | Phylum | Top known hit | Identities | Gaps |
|--------------|---------|--------|---------------|------------|------|
|--------------|---------|--------|---------------|------------|------|

|         |                                     |                |                                                 |                     |                 |
|---------|-------------------------------------|----------------|-------------------------------------------------|---------------------|-----------------|
| Leu_spp | <i>Leucobacter</i> spp.             | Actinobacteria | <i>Leucobacter</i> sp. Re-6                     | 1332/1332<br>(100%) | 0/1332<br>(0%)  |
| Sph_spp | <i>Sphingobacterium</i> spp.        | Bacteroidetes  | <i>Sphingobacterium</i> sp. strain JPB23        | 1305/1340<br>(97%)  | 0/1340<br>(0%)  |
| Sph_m   | <i>Sphingobacterium multivorum</i>  | Bacteroidetes  | <i>Sphingobacterium multivorum</i> strain GZT-2 | 1341/1342<br>(99%)  | 1/1342<br>(0%)  |
| Ser_m   | <i>Serratia marcescens</i>          | Proteobacteria | <i>Serratia</i> sp. strain p2                   | 1346/1346<br>(100%) | 0/1346<br>(0%)  |
| Aci_s   | <i>Acinetobacter soli</i>           | Proteobacteria | <i>Acinetobacter soli</i> strain GFJ2           | 1347/1349<br>(99%)  | 0/1349<br>(0%)  |
| Ste_m   | <i>Stenotrophomonas maltophilia</i> | Proteobacteria | <i>Stenotrophomonas maltophilia</i> strain D299 | 1259/1350<br>(93%)  | 1/1350<br>(0%)  |
| Och_spp | <i>Ochrobactrum</i> spp.            | Proteobacteria | <i>Ochrobactrum</i> sp. Azn6.2                  | 1296/1307<br>(99%)  | 10/1307<br>(0%) |

### 3.2 *S. marcescens* secreted larvicidal molecule into spent medium when cultured under static condition

Because larval mortality was observed a few days after bacterial bloom, we hypothesized that the isolated bacteria could secrete larvicidal molecule(s) after the bacteria grow to a certain density; at a time when biofilm was observed at the bottom of the pan for a few days. Therefore, the isolated bacteria were cultured under either static or planktonic conditions for three days before spent media collection for the screening of larvicidal activity.

None of the cell-free spent media obtained from planktonic condition had any toxicity against *An. dirus* larvae (Figure 1A). However, for the stationary culture, only the cell-free spent media from *S. marcescens* had a detrimental effect on the survival of the larvae (Figure 1A). Next, spent medium of *S. marcescens* cultured under planktonic and static conditions was collected over time after 1, 2, or 3 days of incubation. Again, the larvicidal molecule was secreted into the *S. marcescens* only under static culture condition and the larvicidal activity of the spent medium increased over time starting from the second day after inoculation (Figure 1B).

To investigate if the *S. marcescens* cells are entomopathogenic to *An. dirus* larvae, the bacterium was cultured under a static condition then washed with 1X PBS. Washed bacterial cells were then added to larval culture at various concentrations (Figure 1C). Even at OD<sub>600</sub> of 5, *S. marcescens* cells did not cause significant mortality to *An. dirus* larvae. The *Escherichia coli* cells used as a control also did not cause larval mortality. These results suggested that *S. marcescens* only cause larval mortality through the secretion of entomopathogenic molecules.

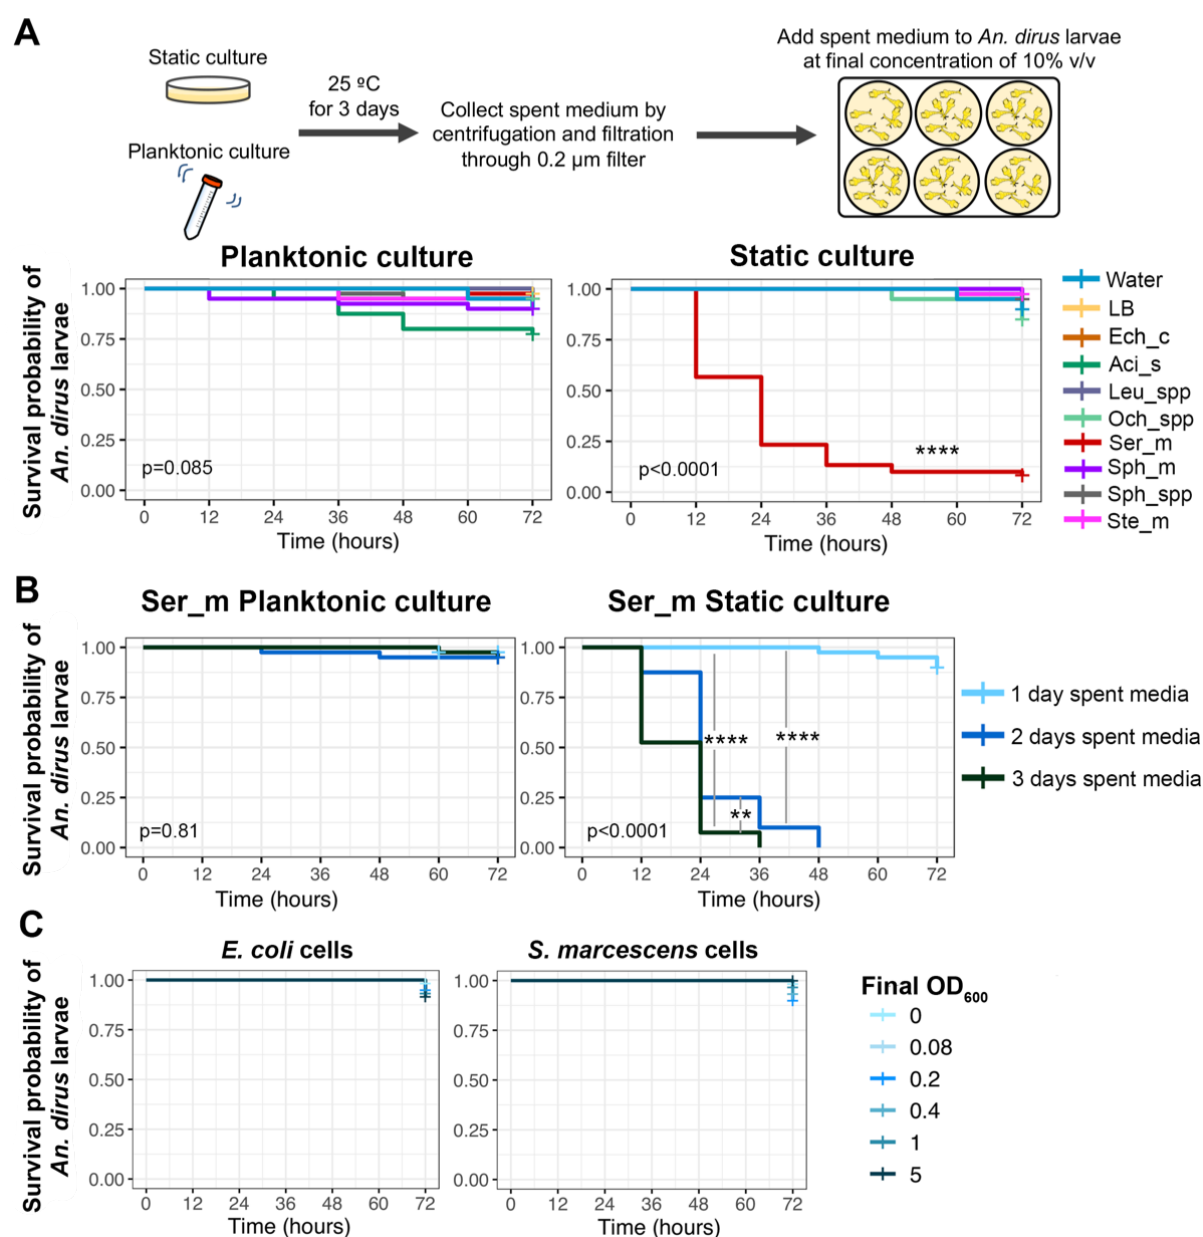

Figure 1. Survival analyses of *An. dirus* mosquito larvae after treatment with bacterial spent media at 10% (v/v) concentration. (A) Survival curve of *An. dirus* larvae after treatment with

bacterial spent media cultured under planktonic condition or static condition. The spent media were collected at three days after incubation under planktonic or static state at 25 °C Ech\_c: *Escherichia coli* strain XL10, Aci\_s: *Acinetobacter soli*, Leu\_spp: *Leucobacter* spp., Och\_spp: *Ochrobactrum* spp., Ser\_m: *Serratia marcescens*, Sph\_m: *Sphingobacterium multivorum*, Sph\_spp: *Sphingobacterium* spp., Ste\_m: *Stenotrophomonas maltophilia*. LB medium or water was used as a control at final concentration of 10% (v/v). The experiment was performed in triplicate (B) Survival curve of *An. dirus* larvae after treatment with *S. marcescens* spent medium cultured under planktonic or static condition and collected after 1, 2, or 3 days after inoculation. The experiment was performed in duplicate (C) Survival curve of *An. dirus* larvae after treatment with *E. coli* or *S. marcescens* cells at various concentration. Bacterial cells were cultured under static condition at 25 °C then washed twice with PBS. The experiment was performed in triplicate. Statistical significance of the survival analyses was calculated using Log-rank test followed by a Bonferroni post-hoc analysis using 'survminer' package in R. Significance level: \*\*: p<0.01, \*\*\*\*: p<0.0001.

### 3.3 Larvicidal molecules from *S. marcescens* are heat sensitive macromolecules

Because the nature of larvicidal molecule would dictate subsequent methods for identification and characterization, the larvicidal molecule was then next broadly characterized based on heat sensitivity and molecular weight. The *S. marcescens* filtered spent medium was heated at 45, 70 and 95 °C for one hour then used to determine larvicidal activity at 10% (v/v) (Figure 2A). The larvicidal molecules secreted by *S. marcescens* are heat-sensitive as the heat treatment at 45 °C for 1 hour significantly reduced the 3-day mortality rate of treated larvae from 100% to 35%. Heat treatment at 70 and 95 °C completely destroyed the larvicidal activity. To further characterize if the heat-labile active larvicidal elements were small or large macromolecules, we fractionated the active spent media by size exclusion using Amicon® Ultra-4 10K filter device and tested their larvicidal activity. The result shows that only the macromolecule fraction with molecular weight larger than 10 kDa possesses larvicidal activity (Figure 2B).

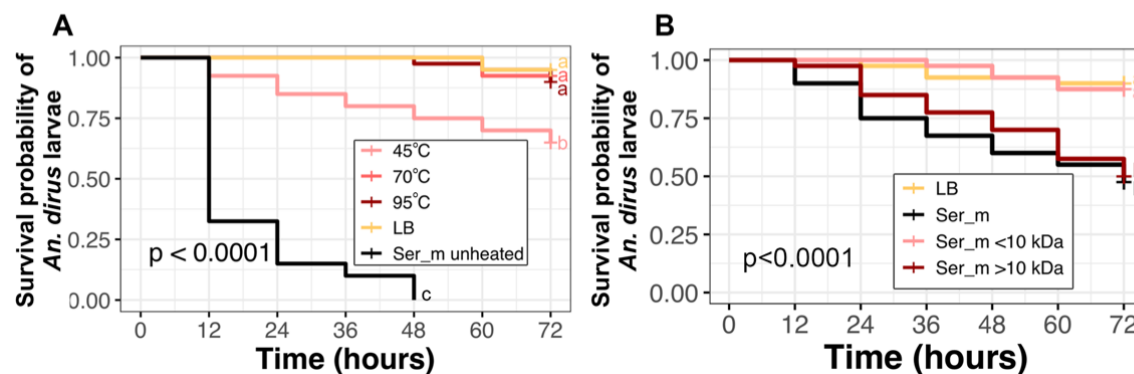

Figure 2. Larvicidal molecule(s) secreted by *S. marcescens* are heat sensitive macromolecule(s). (A) Heat sensitivity of larvicidal activity from *S. marcescens* spent medium. The *S. marcescens* spent medium was heated at 45, 70, and 95 °C for one hour before testing for larvicidal activity at 10% (v/v) final concentration. LB medium was used as a control at a final concentration of 10% (v/v). The experiment was performed in duplicate (B) Larvicidal activity of *S. marcescens* spent medium after separation of small (<10 kDa) and macromolecules (>10 kDa) using Amicon® Ultra-4 10K filter device at 10% (v/v). LB medium was used as a control at final concentration of 10% (v/v). The experiment was performed in duplicate. Statistical significance of the survival analyses was calculated using Log-rank test followed by a Bonferroni post-hoc analysis using 'survminer' package in R.

### 3.4 Larvicidal activity of *S. marcescens* spent medium is not likely to be caused by cytotoxicity.

To test the cytotoxicity of *S. marcescens* spent medium against insect cells, the spent medium was used to treat C6/36 cells at the final concentration of 10% (v/v) spent medium in complete L15 medium at 28 °C for 72 hours. When compared to LB medium treatment, the cell viability of C6/36 treated with *E. coli* spent medium, *S. marcescens* spent medium, and cycloheximide were  $111.25 \pm 8.23\%$ ,  $76.79 \pm 15.02\%$ , and  $7.82 \pm 2.06\%$ , respectively (Figure 3). Although statistically significant, the low cytotoxicity level of *S. marcescens* spent medium against C6/36 cells could not support the strong larvicidal activity as shown in our experiments. This could be because the cell does not carry the essential molecule/pathway targeted by *S. marcescens*' entomopathogenic molecules. Another possible explanation is that the death of

*An. dirus* larvae is due to damage at the physiological level rather than direct toxicity to insect cells.

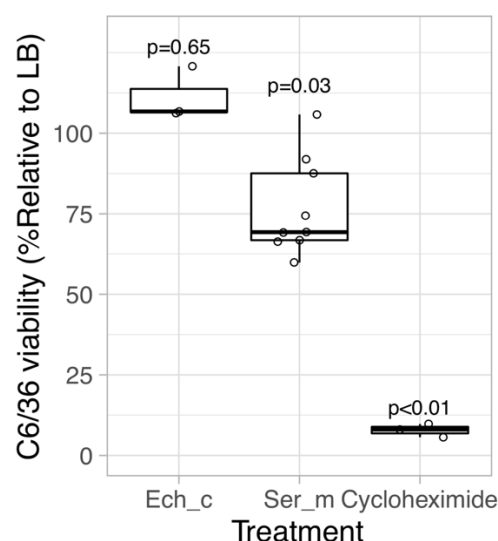

Figure 3. C6/36 cell viability assay of *E. coli* spent medium (Ech\_c), *S. marcescens* spent medium (Ser\_m), and 5  $\mu$ M cycloheximide. The cell viability was shown relative to LB medium treatment. Spent medium and LB were used at 10% (v/v) final concentration. P-values were calculated using raw data from sulforhodamine B assay by One-way ANOVA with TukeyHSD post hoc test with multcompView package in R software.

### 3.5 *S. marcescens* spent medium can directly kill *An. dirus* larvae and also enhance larvae's susceptibility to bacterial infection.

In previous experiments, LB medium was used as a control in the larvicidal assays. We observed that the presence of LB or filtered spent medium allowed bacteria in the environment to grow in these treatments (Figure 1 and 2). Although these bacteria did not cause larval death in the LB-treated group, they might interfere with the larvicidal activity caused by *S. marcescens* spent medium treatment.

To test whether these naturally growing bacteria have any impact on larvicidal activity by *S. marcescens*, penicillin (100 U/mL) and streptomycin (100  $\mu$ g/mL) were added in the larvicidal assay experiment to prevent bacterial growth. The addition of antibiotics significantly



inhibited bacterial contamination because water in each well of the larvicidal assay remained clear throughout the experiment. In the absence of natural bacterial growth, the macromolecules secreted by *S. marcescens* can still kill *An. dirus* larvae confirming its intrinsic entomopathogenic property (Figure 4A). Interestingly, the observed mortality in the antibiotics-treated group was significantly lower than the group without antibiotics treatment. In addition to antibiotics treatment, resuspension of *S. marcescens* macromolecules in 1X PBS instead of LB also reduced natural bacterial growth in larvicidal assays. Even without obvious natural bacterial growth, *S. marcescens* macromolecule resuspended in 1X PBS could kill *An. dirus* larvae in a dose dependent manner (Figure 4B). These results suggest that the larvicidal molecule has intrinsic larvicidal activity, and also increases larvae's susceptibility to bacterial infection.

To confirm the hypothesis that *S. marcescens* secreted macromolecules increases larvae's susceptibility to bacterial infection, we next pretreated *An. dirus* larvae with sublethal dose of *S. marcescens* secreted macromolecule (0.5X diluted in PBS; see Figure 4B) for 24 hours then added an entomopathogenic strain of *Pseudomonas* sp. at the final bacterial density of OD<sub>600</sub> = 5, 1, 0.4, 0.2, and 0.08 (Figure 4C). *An. dirus* larvae pretreated with *S. marcescens* secreted macromolecules significantly increased the mortality rate caused by *Pseudomonas* sp. in all treatment except at OD5, which the entomopathogenicity was too high to observe the difference. These results confirm significant effect of *S. marcescens* macromolecules on susceptibility of *An. dirus* larvae to bacterial infection, even at sublethal dose.



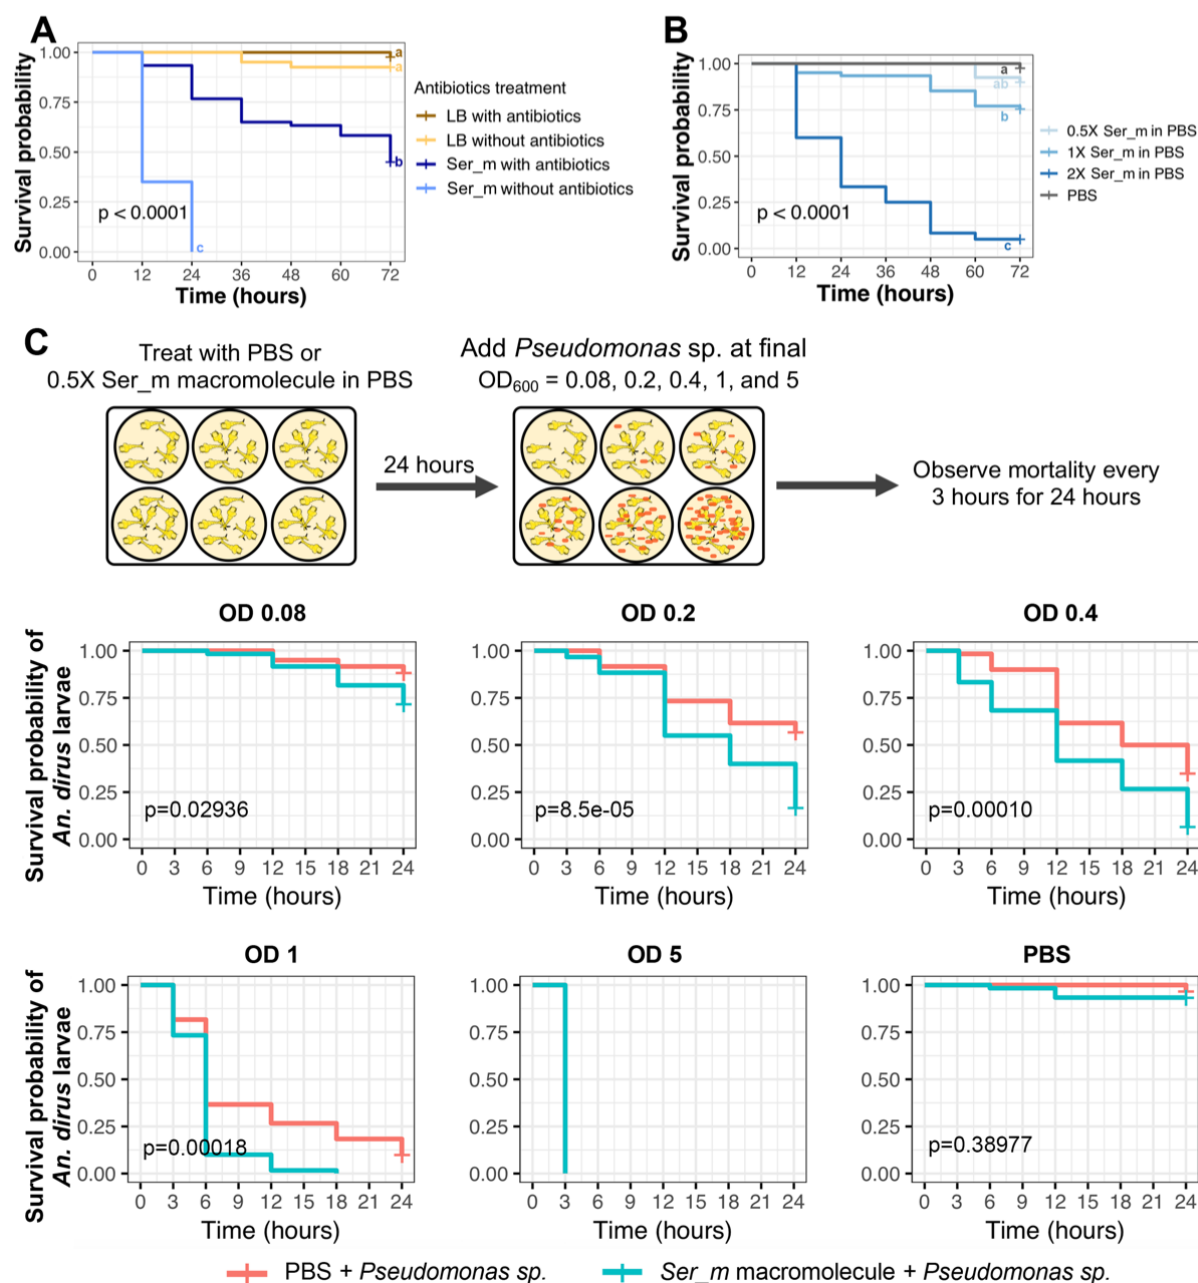

Figure 4. Intrinsic larvicidal activity of *S. marcescens* macromolecule and its enhancing effect on larvae's susceptibility to bacterial infection. (A) Survival of *An. dirus* larvae treated with 2X concentration of macromolecules from *S. marcescens* spent medium diluted in LB with or without antibiotics. LB with or without antibiotics were used as a control. The experiment was performed in duplicate. (B): *An. dirus* larvae treated with *S. marcescens* macromolecules reconstituted to the final concentration of 0.5X, 1X, and 2X in PBS. The experiment was performed in duplicate. (C): Treatment of sublethal dose of *S. marcescens* secreted macromolecule enhances *An. dirus* larvae susceptibility to bacterial infection. The larvae were

treated for 24 hours with 0.5x concentration of macromolecules from *S. marcescens* diluted in PBS buffer before addition of *Pseudomonas* sp. at final concentration of OD<sub>600</sub> = 0.08, 0.2, 0.4, 1, and 5. Mortality of the larvae was monitored every 3 hours for 24 hours. The experiment was performed in triplicates. Statistical significance of the survival analyses was calculated using Log-rank test followed by a Bonferroni post-hoc analysis using 'survminer' package in R.

### 3.6 *S. marcescens* secreted different sets of macromolecules when cultured under different conditions

Because we observed different levels of larvicidal activity from *S. marcescens* spent medium when cultured under different conditions, the comparison of macromolecules from these culture conditions would help us to pinpoint macromolecule(s) that has larvicidal activity. Although the planktonic condition did not induce secretion of a larvicidal molecule, *S. marcescens* barely secreted proteins under planktonic condition. Further comparison between these two conditions would yield several protein candidates for further studies.

To identify other culture conditions that might result in differential larvicidal activity, *S. marcescens* was cultured under static condition at different temperatures, 25 °C and 37 °C. Here, *S. marcescens* spent medium from 25 °C incubation could kill *An. dirus* larvae while those cultured at 37 °C could not (Figure 5A).

Pattern of secreted protein from *S. marcescens* cultured at 25 °C and 37 °C was then compared by SDS-PAGE (Figure 5B). Two major protein bands (approximately 110 and 55 kDa) were observed in the spent medium from 25°C culture but not 37°C (Figure 5B). These two protein bands were then excised from the gel then subjected to LC-MS/MS for identification.

The 110 kDa protein band consists of several protease enzymes including aminopeptidase N, serralsin, and peptidase M60 viral enhancin protein; chitinase enzymes including chain A chitobiase; cell surface protein; DUF4214 domain-containing protein;

hemolysin; DUF4214 domain-containing protein; peptide ABC transporter substrate-binding protein; aconitate hydratase; DNA-directed RNA polymerase; formate dehydrogenase-N subunit alpha; glycine dehydrogenase; translation elongation factor Tu; phosphoenolpyruvate carboxykinase; LysR family transcriptional regulator; short-chain dehydrogenase/reductase SDR; phosphorylcholine phosphatase; acyl-CoA dehydrogenase (Supplementary table 1).

The 55 kDa protein band also consists of proteases including serralyisin, proline dipeptidase, extracellular serine protease precursor, secreted alkaline metalloproteinase, and Xaa-Pro aminopeptidase; chitinase enzyme; serine 3-dehydrogenase; DUF4214 domain-containing protein; arginine-tRNA ligase; succinylarginine dihydrolase; cell surface protein; histidine ammonia-lyase; capsule assembly Wzi family protein; glutathione reductase; phosphoenolpyruvate carboxykinase; flagellin; F0F1 ATP synthase subunit beta; and hypothetical protein (Supplementary table 2).

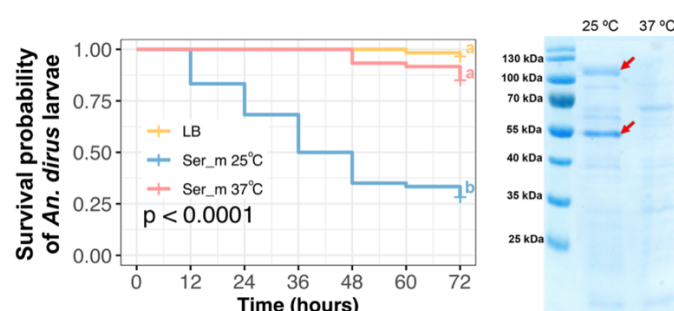

Figure 5. *S. marcescens* secreted larvicidal molecules when cultured under static condition at 25 °C but not 37 °C. (A) Survival curve of *An. dirus* larvae after treatment with *S. marcescens* spent media cultured under static condition at 25 °C or 37 °C. The experiment was performed in triplicate. Statistical significance of the survival analyses was calculated using Log-rank test followed by a Bonferroni post-hoc analysis using 'survminer' package in R. (B) SDS-PAGE of *S. marcescens* spent media cultured under static condition at 25 °C or 37 °C. Two red arrows indicate major protein bands that were expressed when the bacterium was cultured at 25 °C but not 37 °C.

Supplementary Table 1. LC-MS analysis of 110 kDa protein band.

| Accession  | Description                                                                            | Coverage [%] | # Peptides | # PSMs | # AAs | MW [kDa] | calc. pI | Score  | Sequest HT |
|------------|----------------------------------------------------------------------------------------|--------------|------------|--------|-------|----------|----------|--------|------------|
| 1081143318 | cell surface protein<br>[ <i>Serratia</i> sp.<br>HMSC15F11]                            | 27           | 18         | 84     | 998   | 100.9    | 4.79     | 210.67 |            |
| 1333427106 | DUF4214 domain-<br>containing protein<br>[ <i>Serratia marcescens</i> ]                | 10           | 7          | 65     | 1000  | 101.1    | 4.83     | 191.57 |            |
| 1047610669 | aminopeptidase N<br>[ <i>Serratia marcescens</i><br>subsp. <i>marcescens</i> ]         | 15           | 10         | 11     | 872   | 98.1     | 5.49     | 16.76  |            |
| 1184111806 | peptidase M60 viral<br>enhancin protein [ <i>Serratia marcescens</i> ]                 | 11           | 8          | 9      | 855   | 94.3     | 6.39     | 16.36  |            |
| 983153020  | peptidase M60 viral<br>enhancin protein [ <i>Serratia marcescens</i> ]                 | 11           | 8          | 9      | 855   | 94.2     | 6.32     | 16.29  |            |
| 1091769957 | hemolysin [ <i>Serratia marcescens</i> ]                                               | 11           | 13         | 15     | 1608  | 165      | 8.73     | 10.8   |            |
| 1027975265 | peptide ABC transporter<br>substrate-binding protein<br>[ <i>Serratia marcescens</i> ] | 4            | 2          | 2      | 535   | 59.9     | 7.2      | 4.13   |            |
| 542019733  | protease [ <i>Serratia marcescens</i> EGD-HP20]                                        | 4            | 3          | 3      | 964   | 107.6    | 6.2      | 3.55   |            |
| 944700465  | aconitate hydratase<br>[ <i>Serratia</i> sp. Leaf50]                                   | 2            | 1          | 1      | 891   | 97.3     | 5.85     | 2.77   |            |

|            |                                                                                                 |   |   |   |      |       |      |      |
|------------|-------------------------------------------------------------------------------------------------|---|---|---|------|-------|------|------|
| 291423462  | DNA-directed RNA polymerase, beta subunit<br>[ <i>Serratia odorifera</i> DSM 4582]              | 5 | 5 | 6 | 1365 | 153   | 5.2  | 2.73 |
| 1194684911 | MULTISPECIES: formate dehydrogenase-N subunit alpha [ <i>Serratia</i> ]                         | 1 | 1 | 1 | 1015 | 112.7 | 7.14 | 2.7  |
| 1340368250 | glycine dehydrogenase (aminomethyl-transferring), partial<br>[ <i>Serratia</i> sp. SSNIH2]      | 4 | 1 | 1 | 246  | 26.4  | 8.73 | 2.45 |
| 1047638873 | hypothetical protein AN660_0220605 [ <i>Serratia marcescens</i> subsp. <i>marcescens</i> ]      | 2 | 1 | 1 | 718  | 81.3  | 5    | 2.45 |
| 1000823267 | Translation elongation factor Tu [ <i>Serratia rubidaea</i> ]                                   | 2 | 1 | 1 | 394  | 43.2  | 5.31 | 2.3  |
| 1047650606 | phosphoenolpyruvate carboxykinase (ATP) [ <i>Serratia marcescens</i> subsp. <i>marcescens</i> ] | 7 | 4 | 4 | 539  | 59.3  | 5.5  | 1.97 |
| 1001786477 | LysR family transcriptional regulator [ <i>Serratia rubidaea</i> ]                              | 4 | 1 | 1 | 306  | 33.2  | 9    | 1.92 |
| 1006552443 | DNA-directed RNA polymerase subunit beta' [ <i>Serratia ficaria</i> ]                           | 3 | 3 | 3 | 1408 | 155   | 6.74 | 1.78 |

|            |                                                                                          |   |   |   |     |      |      |      |
|------------|------------------------------------------------------------------------------------------|---|---|---|-----|------|------|------|
| 1195419500 | short-chain<br>dehydrogenase/reductase<br>SDR [Serratia<br>marcescens]                   | 2 | 1 | 1 | 297 | 31.7 | 7.15 | 1.71 |
| 363988229  | succinyl-CoA synthetase<br>alpha subunit [Serratia<br>sympiotica str. 'Cinara<br>cedri'] | 3 | 1 | 1 | 291 | 30.5 | 7.72 | 1.7  |
| 640696690  | MULTISPECIES:<br>phosphorylcholine<br>phosphatase [Serratia]                             | 2 | 1 | 1 | 353 | 39.8 | 6.58 | 1.69 |
| 1048498251 | Serralysin precursor<br>[Serratia marcescens]                                            | 9 | 3 | 3 | 487 | 52.2 | 4.89 | 1.67 |
| 408489453  | Chain A, 1 Chitobiase                                                                    | 6 | 4 | 5 | 858 | 95.7 | 6.57 | 1.64 |
| 977285585  | Chitobiase precursor<br>[Serratia marcescens]                                            | 8 | 5 | 6 | 885 | 98.3 | 6.52 | 1.64 |
| 948122997  | acyl-CoA dehydrogenase<br>[Serratia sp. Leaf51]                                          | 1 | 1 | 1 | 822 | 90.2 | 7.06 | 1.64 |

428

## 429 **Supplementary Table 2**

430 LC-MS analysis of 55 kDa protein band

| Accession  | Description                                   | Coverage<br>[%] | #<br>Peptides | #<br>PSMs | # AAs | MW<br>[kDa] | calc.<br>pI | Score<br>Sequest<br>HT |
|------------|-----------------------------------------------|-----------------|---------------|-----------|-------|-------------|-------------|------------------------|
| 1048498251 | Serralysin precursor<br>[Serratia marcescens] | 36              | 15            | 76        | 487   | 52.2        | 4.89        | 166.7                  |

|            |                                                                                     |    |    |    |      |       |      |        |
|------------|-------------------------------------------------------------------------------------|----|----|----|------|-------|------|--------|
| 1205048185 | serine 3-dehydrogenase<br>[ <i>Serratia nematodiphila</i> ]                         | 31 | 13 | 43 | 472  | 50.4  | 4.75 | 96.43  |
| 452850059  | insecticidal serralysin-like<br>protein, partial [ <i>Serratia<br/>marcescens</i> ] | 52 | 14 | 69 | 320  | 35    | 5.33 | 144.33 |
| 1333426919 | serine 3-dehydrogenase<br>[ <i>Serratia marcescens</i> ]                            | 25 | 12 | 31 | 472  | 50.4  | 4.74 | 71.38  |
| 1268850421 | serine 3-dehydrogenase<br>[ <i>Serratia</i> sp. BW106]                              | 18 | 8  | 29 | 487  | 51.9  | 4.82 | 67.01  |
| 1122396880 | DUF4214 domain-<br>containing protein<br>[ <i>Serratia marcescens</i> ]             | 4  | 3  | 12 | 1000 | 101   | 4.87 | 39.48  |
| 1047617935 | arginine--tRNA ligase<br>[ <i>Serratia marcescens</i><br>subsp. marcescens]         | 22 | 12 | 12 | 576  | 63.9  | 5.55 | 18.71  |
| 1039033801 | succinylarginine<br>dihydrolase [ <i>Serratia<br/>marcescens</i> ]                  | 27 | 12 | 12 | 446  | 49.4  | 6.77 | 11.96  |
| 1081143318 | cell surface protein<br>[ <i>Serratia</i> sp. HMSC15F11]                            | 10 | 6  | 8  | 998  | 100.9 | 4.79 | 7.17   |
| 1334464241 | histidine ammonia-lyase<br>[ <i>Serratia marcescens</i> ]                           | 19 | 7  | 8  | 514  | 54.9  | 6    | 12.68  |
| 1127886605 | Proline dipeptidase<br>[ <i>Serratia marcescens</i><br>SMB2099]                     | 18 | 7  | 9  | 444  | 50.2  | 6.38 | 11.32  |
| 977423541  | Extracellular serine<br>protease precursor<br>[ <i>Serratia marcescens</i> ]        | 12 | 8  | 9  | 1034 | 107.8 | 5.39 | 4.24   |

|            |                                                                              |    |   |   |     |      |      |       |
|------------|------------------------------------------------------------------------------|----|---|---|-----|------|------|-------|
| 1280179082 | capsule assembly Wzi family protein [ <i>Serratia</i> sp. TKO39]             | 17 | 6 | 6 | 478 | 52.7 | 5.41 | 6.61  |
| 1027970958 | Xaa-Pro aminopeptidase [ <i>Serratia marcescens</i> ]                        | 11 | 4 | 5 | 438 | 49   | 5.38 | 7.85  |
| 1027968317 | glutathione reductase [ <i>Serratia marcescens</i> ]                         | 16 | 5 | 5 | 450 | 48.5 | 6.38 | 6.32  |
| 1001783318 | phosphoenolpyruvate carboxykinase (ATP) [ <i>Serratia rubidaea</i> ]         | 5  | 2 | 2 | 539 | 59   | 5.25 | 1.95  |
| 1216656901 | flagellin [ <i>Serratia marcescens</i> ]                                     | 11 | 4 | 5 | 423 | 44.4 | 5.24 | 1.99  |
| 493760228  | F0F1 ATP synthase subunit beta [ <i>Serratia symbiotica</i> ]                | 7  | 2 | 2 | 460 | 50.2 | 5.12 | 2.55  |
| 1141208419 | serine 3-dehydrogenase [ <i>Serratia oryzae</i> ]                            | 6  | 3 | 7 | 522 | 55.7 | 4.54 | 11.77 |
| 1028171175 | hypothetical protein [ <i>Serratia</i> sp. YD25]                             | 4  | 2 | 2 | 568 | 60.8 | 4.65 | 2.17  |
| 676309841  | N-succinylglutamate 5-semialdehyde dehydrogenase [ <i>Serratia</i> sp. SCBI] | 2  | 1 | 1 | 639 | 68.5 | 9.8  | 2.13  |
| 383294472  | glucose-6-phosphate isomerase [ <i>Serratia</i> sp. M24T3]                   | 4  | 2 | 2 | 549 | 61.2 | 6.09 | 1.64  |



|            |                                                                           |   |   |   |     |      |      |      |
|------------|---------------------------------------------------------------------------|---|---|---|-----|------|------|------|
| 1000823334 | Secreted alkaline metalloproteinase<br>[ <i>Serratia rubidaea</i> ]       | 4 | 2 | 6 | 497 | 53.2 | 4.7  | 9.45 |
| 1057964136 | chitinase [ <i>Serratia</i> sp. YD25]                                     | 3 | 2 | 2 | 480 | 51.8 | 5.62 | 2    |
| 1195419500 | short-chain dehydrogenase/reductase SDR<br>[ <i>Serratia marcescens</i> ] | 2 | 1 | 3 | 297 | 31.7 | 7.15 | 5.5  |
| 1142792582 | serine 3-dehydrogenase<br>[ <i>Serratia</i> sp. S119]                     | 3 | 1 | 1 | 479 | 52   | 4.81 | 1.8  |
| 1006546552 | NADP-dependent isocitrate dehydrogenase<br>[ <i>Serratia ficaria</i> ]    | 3 | 1 | 1 | 417 | 45.6 | 5.68 | 2.03 |

431

### 432 3.7 Chitinase inhibitor reduced larvicidal activity of *S. marcescens* spent medium.

433 Because the LC-MS analysis suggested that our strain of *S. marcescens* expressed  
434 chitinase and chitobiose enzymes when cultured under static condition at 25 °C but not 37 °C,  
435 we then inoculated the bacterium on LB agar supplemented with 0.5% chitin then incubated  
436 at 25 °C or 37 °C to determined chitinase secretion. After five days of incubation, *S.*  
437 *marcescens* cultured at 25 °C produced a clear zone while the incubation at 37 °C did not  
438 (Figure 6A). Chitinase activity was also determined in the liquid static culture by pHBAH assay.  
439 Chitinase activity of *S. marcescens* spent medium increased overtime during the incubation  
440 under static condition at 25 °C and saturated after 3 days of incubation (Figure 6B). This result  
441 coincides well with the increase in larvicidal activity during the first three days of *S.*  
442 *marcescens* incubation (Figure 1B).

Cyclic dipeptides such as Cyclo-Gly-Pro have previously been reported to inhibit chitinase enzyme activity (Houston et al., 2004). This compound was then used to confirm that the larvicidal activity was due to chitinase secretion. The results in Figure 6C show that Cyclo-Gly-Pro can inhibit chitinase activity of *S. marcescens* spent medium in a dose-dependent manner. At 8 mM, Cyclo-Gly-Pro inhibited chitinase activity by  $53.36 \pm 12.22\%$ , which was not significantly different from  $56.81 \pm 8.34\%$  inhibition by 10 mM Cyclo-Gly-Pro (Figure 6C). Thus, 8 mM Cyclo-Gly-Pro was used in the following larvicidal assays. Larvicidal activity was significantly reduced when 8 mM Cyclo-Gly-Pro was added to the spent medium compared to the group without the chitinase inhibitor, albeit not to the same level as the LB control (Figure 6D). This might be due to the incomplete inhibition of the chitinase activity or other enzymes might be contributing to the larvicidal activity in addition to chitinases.

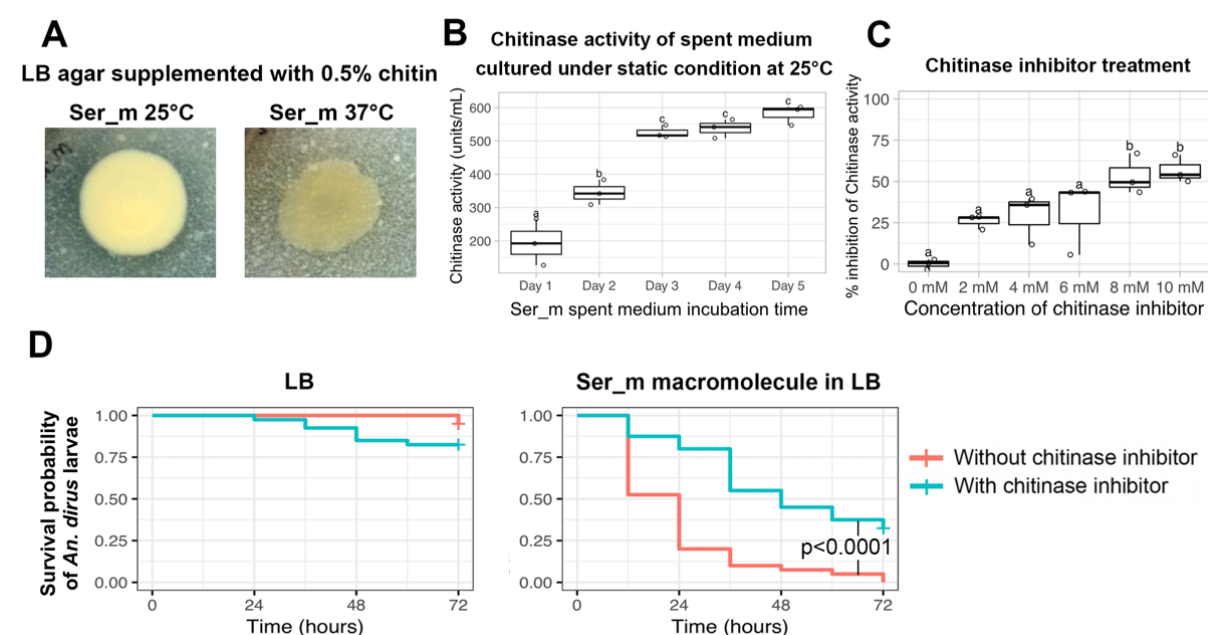

Figure 6. *S. marcescens* secreted macromolecules have chitinase activity and chitinase inhibitor reduced larvicidal activity. (A) *S. marcescens* secreted chitinase that resulted in a clear zone around bacterium colony when cultured at 25 °C but not 37 °C. (B) *S. marcescens* spent medium accumulated chitinase activity over time and saturated after three days of incubation. One unit of chitinase activity was defined as the amount of enzyme which releases 1 µg of reducing sugar per hour as measured by pHBAH assay. (C) Cyclo-Gly-Pro inhibit

chitinase activity in a dose-dependent manner. Statistical analyses comparing chitinase activity and inhibition of chitinase activity were performed using One-way ANOVA with Tukey multiple comparison test using multcompView package in R. (D) Chitinase inhibitor reduced larvicidal activity of the *S. marcescens* secreted macromolecule. The experiment was performed in duplicate. Statistical significance of the survival analyses was calculated using Log-rank test followed by a Bonferroni post-hoc analysis using 'survminer' package in R.

### 3.8 Protease inhibitors reduced larvicidal activity of *S. marcescens* spent medium.

The LC-MS results indicated that *S. marcescens* secreted several proteases when cultured at 25 °C under a static condition. Some of these proteases have been reported for insecticidal activity in other insects (Baumann, 2013; Wang and Granados, 1997). Therefore, we added the Complete protease inhibitor (Roche) supplemented with 5 mM EDTA in the larvicidal assays to determine whether these proteases contributed to *S. marcescens* larvicidal activity. We found that protease inhibitors significantly reduced the three-day mortality of the larvae to 50% as compared to 87.5% of the control group without protease inhibitors. This suggests that the larvicidal activity of proteases was partially involved in the observed larval mortality (Figure 7).

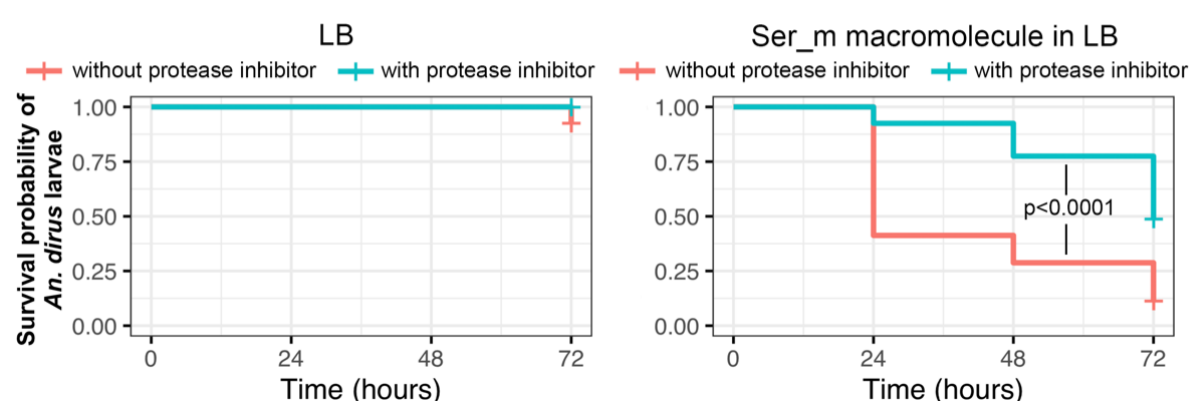

Figure 7. Protease inhibitor reduced larvicidal activity of *S. marcescens* secreted macromolecule. The experiment was performed in four replicates. Statistical significance of the survival analyses was calculated using Log-rank test followed by a Bonferroni post-hoc analysis using 'survminer' package in R.

## 4. Discussion

In this study, a strain of non-prodigiosin producing *S. marcescens* was identified and found to secrete molecules with larvicidal activity against *Anopheles dirus*, a malaria vector in Southeast Asia. *S. marcescens* is a Gram negative bacterium commonly found in soil and water but not as a human fecal microbiome (Donnenberg, 2015). With such natural habitats, it is often associated with insects including mosquitoes (Gendrin and Christophides, 2013; Wang et al., 2017, 2011). Interestingly, different strains of *S. marcescens* can have different relationship with *Anopheles* mosquitoes ranging from symbiotic (Wang et al., 2017) to entomopathogenic (Bahia et al., 2014). The cells of *S. marcescens* isolated in the present study did not kill *An. dirus* larvae directly, but it can secrete larvicidal molecules into the culture medium when cultured under static condition for at least 2-3 days. The results were in accordance with our original observations that the larval death occurred a few days after larval water became turbid. The fact that the larvicidal molecules were secreted is an advantage for application purposes, given that the secreted factors can be applied instead of the bacterium. Thus preventing or limiting the risk of nosocomial infections (Golemi-Kotra, 2008). The secreted factors can also be expressed heterologously in other expression systems that are more suited for industrial scale production.

*S. marcescens* has been extensively studied for its potential as insect pest control agent in agriculture due to its insecticidal property (Bidari et al., 2017; Li et al., 2011; Miller et al., 2008; Pineda-Castellanos et al., 2015; Tu et al., 2010). The bacterium was known to secrete many insect virulence factors including several enzymes, as well as secondary metabolite including a red pigment prodigiosin. Prodigiosin is a metabolite possessing several bioactivities including antimalarial and insecticidal/mosquito larvicidal properties (Bidari et al., 2017; Darshan and Manonmani, 2015; Patil et al., 2011; Suryawanshi et al., 2015). The fact that our *S. marcescens* isolate doesn't produce red pigment suggested that the bacterium secrete other mosquito larvicidal molecules. This finding is in line with a previous study

reporting that level of prodigiosin production did not correlate with *S. marcescens* insecticidal activity against silk worm larva (Zhou et al., 2016).

The heat-labile larvicidal macromolecules were secreted only when *S. marcescens* was cultured under static condition at lower temperature of 25 °C but not 37 °C nor at 25 °C under planktonic condition. These results suggested that the metabolic activity of this bacterium was influenced by culture conditions, consequently affecting the subsets of molecules secreted by this strain of *S. marcescens*. Comparison of protein expression profiles between the 25 °C and 37 °C static cultures helped us to identify potential proteins with larvicidal activity which include many proteases and chitinases. Protease and chitinase activities were then associated with larvicidal activity against *An. dirus* as supplementation of chitinase or protease inhibitors diminished the larvicidal activity. These proteases and chitinases are likely to damage the larvae at physiological levels rather than at the cellular level because the secreted macromolecules lack cytotoxicity against mosquito cells.

Chitin, a polymer of N-acetylglucosamine, is the major component of mosquito extracellular structures including the cuticle of the exoskeleton and the peritrophic matrix (PM) of the midgut in arthropods (Liu et al., 2019). These exoskeletal structures provide strength to the body structure, and serve as muscle attachment sites which allow locomotion and flight (Liu et al., 2019). They are also important barriers for the protection of arthropods from the surrounding environment, mechanical damage, heat, desiccation, and invasion of microorganisms (Liu et al., 2019). With all these important functions, damage to the exoskeleton can be fatal to mosquitoes. Several techniques have been developed to compromise the insects' exoskeleton including inhibition of chitin synthesis (Belinato et al., 2013; Doucet and Retnakaran, 2012; Zhang et al., 2010), and degradation of the chitin structure (Berini et al., 2019; Singh and Arya, 2019). The later strategy has been exploited using chitinase enzymes or chitinase-producing microorganisms; however, many studies suggested that chitinases might not be ideal to be used as a stand-alone insecticide because the larvicidal activity from chitinase can be marginal. Rather, the enzymes could be used to

enhance the insecticidal activity of other control agents including Bt toxin, entomopathogenic virus and chemical insecticides (Kelkenberg et al., 2015; Ramírez-Suero et al., 2011; Zhong et al., 2015). Previous research has demonstrated that chitinases can also help overcome any resistance phenotype developed against a biocontrol strategy. Cai et al. showed that *Bacillus sphaericus* (Bs) toxin-resistant *Culex quinquefasciatus* became susceptible to the Bs treatment when Chitinase AC was overexpressed in *B. sphaericus* (Cai et al., 2007). In addition to the insecticidal property, chitinases can also inhibit fungus by destroying chitinous cell wall structure (Berini et al., 2017; Singh and Arya, 2019; Zarei et al., 2011). *S. marcescens* has been tested to be used against plant fungal pathogen due to its fungicidal properties (Purkayastha et al., 2018) making it an interesting candidate to be used against several classes of agricultural diseases.

Peritrophic matrix (PM) is an acellular structure inside the mosquito gut that compartmentalize gut content from the midgut epithelium (Richards and Richards, 1977; Terra, 2001). It serves as a barrier to protect the insect from the digestive enzymes, abrasion from food particles, and invading parasites (Terra, 2001). PM structure consist of chitin and proteins network, with peritrophins as major protein components (Terra, 2001). The secreted chitinase and proteases could damage the structure of peritrophic matrix thus destroying the larvae's homeostasis and result in larval death. In addition to direct killing, the compromised peritrophic matrix can be responsible for enhanced susceptibility to bacterial infection observed in our study. For instance, in *Drosophila*, disruption of the peritrophic matrix formation renders the fruit fly more susceptible to bacterial infection (Buchon et al., 2013).

Serralysin, one of the proteases identified from the mass spectrometry analysis of *S. marcescens* secreted macromolecules, has previously been extensively characterized. Serralysin is a metalloprotease first discovered in the culture medium of *Serratia* sp. (Miyata et al., 1970) then later found in other Gram negative bacteria (Baumann, 2013). The protease is secreted as an inactive enzyme and autocatalytically activated in the presence of divalent cations (Baumann, 2013). The enzyme was reported to have entomopathogenic property

against larvae of scarab beetle (Pineda-Castellanos et al., 2015). Interestingly, serralysin was found to have immunosuppression property in silk worm and considered as a virulence factor (Ishii et al., 2014). The mechanism of immunosuppression in the study was through the degradation of hemocyte adhesion molecule. Another study demonstrated that a serralysin-type metalloprotease could cleave other proteins involved in insect immunity found in *Manduca sexta* hemolymph. Examples of these proteins are  $\beta$ -1,3 glucan recognition protein 2 (immune recognition), hemocyte aggregation inhibitor protein (HAIP), serine proteinase, serpin-1 (immune signaling and regulation), and scolexins A and B (coagulation cascade effector function) (Felföldi et al., 2009). The immune suppression by serralysin could be one of the underlying mechanisms by which *An. dirus* larvae were rendered more susceptible to bacterial infection.

Peptidase M60 enhancin protein is a metalloprotease that requires zinc for its function. Enhancin was first described in baculovirus (Hashimoto et al., 1991) then later found in several bacteria and fungi (Nakjang et al., 2012; Slavicek, 2012). Mucin is an important protein component of insect peritrophic matrix including *Anopheles* mosquito (Dinglasan et al., 2009). Enhancin from baculoviruses could degrade intestinal mucin of the insects thus making them more susceptible to viral infection (Toprak et al., 2012; Wang and Granados, 1997) and Bt toxin (Granados et al., 2001). Bacterial enhancin could also digest mucin (Nakjang et al., 2012), but the impact on baculovirus and Bt toxin toxicity were inconclusive (Fang et al., 2009; Galloway et al., 2005; Zhao et al., 2011).

Our results indicate that chitinase and protease inhibitors could only partially reduce the larvicidal activity of the spent medium against *An. dirus* larvae. This suggests that the effect was likely to be a result from a combination of both chitinase and protease enzymes. As discussed above, several previous studies suggested that larvicidal activity of the identified enzymes were marginal on their own. Contribution of each individual enzyme on larvicidal activity should therefore be further investigated. This can be done by heterologous expression of each enzyme to determine lethal doses individually and in combination. The partial



reduction of larvicidal activity could also be a result from incomplete inhibition of chitinases and proteases.

In summary, this study has identified a strain of *S. marcescens* from a larval rearing habitat in the insectary, that secretes chitinases and proteases that are pathogenic to *An. dirus* larvae. In addition to their intrinsic entomopathogenicity, these molecules have potential to increase the larvae's susceptibility to natural entomopathogenic microorganisms, and other mosquito control strategies currently in use. Further studies on dose optimization, formulation of enzyme mixtures, and enzyme modifications to enhance heat stability are needed for its development into field applications.

## Funding

This work was supported by the National Center for Genetic Engineering and Biotechnology (P1751424) given to N. Jupatanakul. The funders had no role in study design, data collection and interpretation.

## Author contributions

**Natapong Jupatanakul:** Conceptualization, Methodology, Validation, Formal analysis, Investigation, Resources, Writing - Original Draft, Writing - Review & Editing, Visualization, Supervision, Project administration, Funding acquisition

**Jutharat Pengon:** Methodology, Validation, Formal analysis, Investigation, Writing - Review & Editing

**Shiela Marie Gines Selisana:** Methodology, Validation, Formal analysis, Investigation, Writing - Review & Editing

**Waeowalee Choksawangarn:** Methodology, Validation, Formal analysis, Investigation, Writing - Original Draft, Writing - Review & Editing

**Nongluck Jaito:** Methodology, Validation, Formal analysis, Investigation, Writing - Original Draft

**Atiporn Saeung:** Methodology, Resources, Writing - Review & Editing



**Ratchanu Bunyong:** Investigation

**Navaporn Posayapisit:** Investigation

**Khrongkhwon Thammatinna:** Investigation

**Nuttiya Kalpongkul:** Investigation

**Kittipat Aupalee:** Investigation

**Trairak Pisitkun:** Methodology, Resources,

**Sumalee Kamchonwongpaisan:** Resources, Writing - Review & Editing

# **Declaration of Competing Interest**

All authors declare that we have no conflict of interest, financial or otherwise.

# **Acknowledgements**

We thank Jose Luis Ramirez (USDA) for the suggestions and editorial help with the manuscript. We are grateful to Asst. Prof. Dr. Patchara Sriwichai from Department of Medical Entomology, Faculty of Tropical Medicine, Mahidol University, who kindly provided *An. dirus* adult used to establish the colonies used in this study to A. Saeung.

# **References:**

Altschul, S.F., Gish, W., Miller, W., Myers, E.W., Lipman, D.J., 1990. Basic local alignment search tool. *J. Mol. Biol.* 215, 403–410.

Bahia, A.C., Dong, Y., Blumberg, B.J., Mlambo, G., Tripathi, A., BenMarzouk-Hidalgo, O.J., Chandra, R., Dimopoulos, G., 2014. Exploring *Anopheles* gut bacteria for *Plasmodium* blocking activity. *Environ. Microbiol.* 16, 2980–2994.

Baumann, P., Clark, M.A., Baumann, L., Broadwell, A.H., 1991. *Bacillus sphaericus* as a mosquito pathogen: properties of the organism and its toxins. *Microbiol Mol Biol Rev.* 55, 425–436.

Baumann, U., 2013. Serralyisin and Related enzymes, in: handbook of proteolytic enzymes. Elsevier, pp. 864–867.

- Belinato, T.A., Martins, A.J., Lima, J.B.P., Valle, D., 2013. Effect of triflumuron, a chitin synthesis inhibitor, on *Aedes aegypti*, *Aedes albopictus* and *Culex quinquefasciatus* under laboratory conditions. *Parasit. Vectors* 6, 83.
- Berini, F., Casartelli, M., Montali, A., Reguzzoni, M., Tettamanti, G., Marinelli, F., 2019. Metagenome-sourced microbial chitinases as potential insecticide proteins. *Front. Microbiol.* 10, 1358.
- Berini, F., Presti, I., Beltrametti, F., Pedroli, M., Vårum, K.M., Pollegioni, L., Sjöling, S., Marinelli, F., 2017. Production and characterization of a novel antifungal chitinase identified by functional screening of a suppressive-soil metagenome. *Microb. Cell Fact.* 16, 16.
- Bidari, F., Shams-Bakhsh, M., Mehrabadi, M., 2017. Isolation and characterization of a *Serratia marcescens* with insecticidal activity from *Polyphylla olivieri* (Col.: Scarabaeidae). *J. Appl. Entomol.* 2142, 162–172.
- Buchon, N., Osman, D., David, F.P.A., Fang, H.Y., Boquete, J.-P., Deplancke, B., Lemaitre, B., 2013. Morphological and molecular characterization of adult midgut compartmentalization in *Drosophila*. *Cell Reports* 3, 1725–1738.
- Cai, Y., Yan, J., Hu, X., Han, B., Yuan, Z., 2007. Improving the Insecticidal activity against resistant *Culex quinquefasciatus* mosquitoes by expression of chitinase gene chiAC in *Bacillus sphaericus*. *Appl. Environ. Microbiol.* 73, 7744–7746.
- Caragata, E.P., Otero, L.M., Carlson, J.S., Dizaji, N.B., Dimopoulos, G., 2020. A non-live preparation of *Chromobacterium* sp. Panama (Csp\_P) is a highly effective larval mosquito biopesticide. *Appl. Environ. Microbiol.* AEM.00240-20.
- Choochote, W., Saeung, A., 2013. Systematic techniques for the recognition of *Anopheles* species complexes, in: Manguin, S. (Ed.). *Anopheles* mosquitoes-new insights into malaria vectors. Intech, pp. 57–79.
- Chouaia, B., Rossi, P., Epis, S., Mosca, M., Ricci, I., Damiani, C., Ulissi, U., Crotti, E., Daffonchio, D., Bandi, C., Favia, G., 2012. Delayed larval development in *Anopheles*

mosquitoes deprived of Asaiabacterial symbionts. BMC Microbiol. 12 Suppl 1(Suppl 1):S2.

Coon, K.L., Vogel, K.J., Brown, M.R., Strand, M.R., 2014. Mosquitoes rely on their gut microbiota for development. Mol. Ecol. 23, 2727–2739.

Darshan, N., Manonmani, H.K., 2015. Prodigiosin and its potential applications. J. Food Sci. Technol. 52, 5393–5407.

Dickson, L.B., Jiolle, D., Minard, G., Moltini-Conclois, I., Volant, S., Ghazlane, A., Bouchier, C., Ayala, D., Paupy, C., Moro, C.V., Lambrechts, L., 2017. Carryover effects of larval exposure to different environmental bacteria drive adult trait variation in a mosquito vector. Sci. Adv. 3, e1700585.

Dinglasan, R., Devenport, M., Florens, L., Johnson, J., McHugh, C., Donnelly-Doman, M., Carucci, D., Yates, J., Jacobs-Lorena, M., 2009. The *Anopheles gambiae* Adult midgut peritrophic matrix proteome. Insect Biochem. Mol. Biol. 39, 125–134.

Donnenberg, M.S., 2015. Enterobacteriaceae, in: Principles and Practice of Infectious Diseases. Elsevier Inc; Philadelphia, PA: 2010. p. 2503.

Doucet, D., Retnakaran, A., 2012. Insect Chitin: Metabolism, Genomics and Pest Management, in: Dhadialla, T.S. (Ed.), Advances in Insect Physiology, Insect Growth Disruptors. Academic Press, pp. 437–511.

Eden, P.A., Schmidt, T.M., Blakemore, R.P., Pace, N.R., 1991. Phylogenetic Analysis of *Aquaspirillum magnetotacticum* using polymerase chain reaction-amplified 16S rRNA-Specific DNA. Int. J. Syst. Bacteriol. 41, 324–325.

Eng, J.K., McCormack, A.L., Yates, J.R., 1994. An approach to correlate tandem mass spectral data of peptides with amino acid sequences in a protein database. J. Am. Soc. Mass Spectr. 5, 976–89.

Fang, S., Wang, L., Guo, W., Zhang, X., Peng, D., Luo, C., Yu, Z., Sun, M., 2009. *Bacillus thuringiensis* Bel protein enhances the toxicity of Cry1Ac protein to *Helicoverpa armigera* larvae by degrading insect intestinal mucin. Appl. Environ. Microbiol. 75, 5237–5243.

Felföldi, G., Marokházi, J., Képiró, M., Venekei, I., 2009. Identification of natural target proteins indicates functions of a serralysin-type metalloprotease, PrtA, in anti-immune mechanisms. *Appl. Environ. Microbiol.* 75, 3120–3126.

Galloway, C.S., Wang, P., Winstanley, D., Jones, I.M., 2005. Comparison of the bacterial Enhancin-like proteins from *Yersinia* and *Bacillus* spp. with a baculovirus Enhancin. *J. Invertebr. Pathol.* 90, 134–137.

Gendrin, M., Christophides, G.K., 2013. The *Anopheles* Mosquito microbiota and their impact on pathogen transmission, in: Manguin, S. (Ed.), *Anopheles Mosquitoes - New Insights into Malaria Vectors*. InTech.

Golemi-Kotra, D., 2008. *Serratia*, *Edwardsiella* and *Morganella* Infections, in: Enna, S.J., Bylund, D.B. (Eds.), *XPharm: The comprehensive pharmacology reference*. Elsevier, New York, pp. 1–6.

Granados, R.R., Fu, Y., Corsaro, B., Hughes, P.R., 2001. Enhancement of *Bacillus thuringiensis* toxicity to *Lepidopterous* Species with the Enhancin from *Trichoplusia ni* Granulovirus. *Biol. Control* 20, 153–159.

Graves, S., Dorai-Raj, H.-P.P. and L.S. with help from S., 2019. multcompView: Visualizations of Paired Comparisons.

Hashimoto, Y., Corsaro, B.G., Granados, R.R., 1991. Location and nucleotide sequence of the gene encoding the viral enhancing factor of the *Trichoplusia ni* granulosis virus. *J. Gen. Virol.* 72, 2645–2651.

Houston, D.R., Synstad, B., Eijssink, V.G.H., Stark, M.J.R., Eggleston, I.M., Aalten, D.M.F. van, 2004. Structure-based exploration of cyclic dipeptide chitinase inhibitors. *J. Med. Chem.* 47, 5713–5720.

Ishii, K., Adachi, T., Hamamoto, H., Sekimizu, K., 2014. *Serratia marcescens* suppresses host cellular immunity via the production of an adhesion-inhibitory factor against immunosurveillance cells. *J. Biol. Chem.* 289, 5876–5888.

Kassambara, A., Kosinski, M., Biecek, P., 2019. survminer: Drawing Survival Curves using “ggplot2” [WWW Document]. URL <https://CRAN.R-project.org/package=survminer>.

- Kelkenberg, M., Odman-Naresh, J., Muthukrishnan, S., Merzendorfer, H., 2015. Chitin is a necessary component to maintain the barrier function of the peritrophic matrix in the insect midgut. *Insect Biochem. Mol.* 56, 21–28.
- Laurence, D., Christophe, L., Roger, F., 2011. Using the Bio-Insecticide *Bacillus thuringiensis israelensis* in Mosquito Control, in: Stoytcheva, M. (Ed.), *Pesticides in the Modern World - Pests Control and Pesticides Exposure and Toxicity Assessment*. InTech.
- Lever, M., 1972. A new reaction for colorimetric determination of carbohydrates. *Anal. Biochem.* 47, 273–279.
- Li, B., Yu, R., Liu, B., Tang, Q., Zhang, G., Wang, Y., Xie, G., Sun, G., 2011. Characterization and comparison of *Serratia Marcescens* Isolated from edible cactus and from silkworm for virulence potential and chitosan susceptibility. *Braz. J. Microbiol.* 42, 96–104.
- Liu, X., Zhang, J., Zhu, K.Y., 2019. Chitin in Arthropods: Biosynthesis, Modification, and Metabolism, in: Yang, Q., Fukamizo, T. (Eds.), *Targeting Chitin-Containing Organisms, Advances in Experimental Medicine and Biology*. Springer, Singapore, pp. 169–207.
- Manguin, S., Garros, C., Dusfour, I., Harbach, R.E. & Coosemans, M., 2008. Bionomics, taxonomy, and distribution of major malaria vector taxa of *Anopheles* subgenus *Cellia* in Southeast Asia: an updated review. *Infect. Genet. Evol.* 8, 489–503.
- Miller, T.A., Lauzon, C.R., Lampe, D.J., 2008. Technological advances to enhance agricultural pest management. *Adv. Exp. Med. Biol.* 627, 141–150.
- Miyata, K., Maejima, K., Tomoda, K., Isono, M., 1970. *Serratia* Protease. *Agric. Biol. Chem.* 34, 310–318.
- MMV-supported projects | Medicines for Malaria Venture [WWW Document], 2020. URL <https://www.mmv.org/research-development/mmv-supported-projects> (accessed 4.5.20).
- Nakjang, S., Ndeh, D.A., Wipat, A., Bolam, D.N., Hirt, R.P., 2012. A Novel extracellular metalloproteinase domain shared by animal host-associated mutualistic and pathogenic microbes. *PLOS ONE* 7, e30287.

Patil, C.D., Patil, S.V., Salunke, B.K., Salunkhe, R.B., 2011. Prodigiosin produced by *Serratia marcescens* NMCC46 as a mosquito larvicidal agent against *Aedes aegypti* and *Anopheles stephensi*. Parasitol. Res. 109, 1179–1187.

Pineda-Castellanos, M.L., Rodríguez-Segura, Z., Villalobos, F.J., Hernández, L., Lina, L., Nuñez-Valdez, M.E., 2015. Pathogenicity of Isolates of *Serratia Marcescens* towards larvae of the Scarab *Phyllophaga Blanchardi* (Coleoptera). Pathogens 4, 210–228.

Purkayastha, G.D., Mangar, P., Saha, A., Saha, D., 2018. Evaluation of the biocontrol efficacy of a *Serratia marcescens* strain indigenous to tea rhizosphere for the management of root rot disease in tea. PLOS One 13, e0191761.

R Core Team, 2020. R: The R Project for Statistical Computing. R Foundation for Statistical Computing, Vienna, Austria.

Ramirez, J.L., Short, S.M., Bahia, A.C., Saraiva, R.G., Dong, Y., Kang, S., Tripathi, A., Mlambo, G., Dimopoulos, G., 2014. *Chromobacterium* Csp\_P Reduces malaria and dengue infection in vector mosquitoes and has entomopathogenic and in vitro anti-pathogen activities. PLoS Pathog. 10, e1004398-13.

Ramírez-Suero, M., Valerio-Alfaro, G., Bernal, J.S., Ramírez-Lepe, M., 2011. Synergistic effect of chitinases and *Bacillus thuringiensis israelensis* spore-toxin complex against *Aedes aegypti* larvae. Can. Entomol. 143, 157–164.

Richards, A.G., Richards, P.A., 1977. The Peritrophic Membranes of Insects. Annu. Rev. Entomol. 22, 219–240.

Shaw, W.R., Catteruccia, F., 2019. Vector biology meets disease control: using basic research to fight vector-borne diseases. Nat. Microbiol. 4, 20–34.

Shevchenko, A., Tomas, H., Havli, J., Olsen, J.V., Mann, M., 2007. In-gel digestion for mass spectrometric characterization of proteins and proteomes. Nat. Protoc. 1, 2856–2860.

Short, S.M., Tol, S. van, MacLeod, H.J., Dimopoulos, G., 2018. Hydrogen cyanide produced by the soil bacterium *Chromobacterium* sp. Panama contributes to mortality in *Anopheles gambiae* mosquito larvae. Sci. Rep. 8, 1–13.

- Singh, G., Arya, S.K., 2019. Antifungal and insecticidal potential of chitinases: A credible choice for the eco-friendly farming. *Biocatal. Agric. Biotechnol.* 20, 101289.
- Slavicek, J.M., 2012. Baculovirus enhancins and their role in viral pathogenicity, in: *Molecular Virology*. InTech. pp. 147–155.
- Suryawanshi, R.K., Patil, C.D., Borase, H.P., Narkhede, C.P., Salunke, B.K., Patil, S.V., 2015. Mosquito larvicidal and pupaecidal potential of prodigiosin from *Serratia marcescens* and understanding its mechanism of action. *Pestic. Biochem. Phys.* 123, 49–55.
- Terra, W.R., 2001. The origin and functions of the insect peritrophic membrane and peritrophic gel. *Arch. Insect Biochem. Physiol.* 47, 47–61.
- Toprak, U., Harris, S., Baldwin, D., Theilmann, D., Gillott, C., Hegedus, D.D., Erlandson, M.A., 2012. Role of enhancin in *Mamestra configurata* nucleopolyhedrovirus virulence: selective degradation of host peritrophic matrix proteins. *J Gen Virol*, 93, 744–753.
- Tu, S., Qiu, X., Cao, L., Han, R., Zhang, Y., Liu, X., 2010. Expression and characterization of the chitinases from *Serratia marcescens* GEI strain for the control of *Varroa destructor*, a honey bee parasite. *J. Invertebr. Pathol.* 104, 75–82.
- Valzania, L., Martinson, V.G., Harrison, R.E., Boyd, B.M., Coon, K.L., Brown, M.R., Strand, M.R., 2018. Both living bacteria and eukaryotes in the mosquito gut promote growth of larvae. *PLoS Negl. Trop. Dis.* 12, e0006638.
- Vichai, V., Kirtikara, K., 2006. Sulforhodamine B colorimetric assay for cytotoxicity screening. *Nat. Protoc.* 1, 1112–1116.
- Wang, P., Granados, R.R., 1997. An intestinal mucin is the target substrate for a baculovirus enhancin. *PNAS* 94, 6977–6982.
- Wang, S., Dos-Santos, A.L.A., Huang, W., Liu, K.C., Oshaghi, M.A., Wei, G., Agre, P., Jacobs-Lorena, M., 2017. Driving mosquito refractoriness to *Plasmodium falciparum* with engineered symbiotic bacteria. *Science* 357, 1399–1402.
- Wang, Y., Iii, T.M.G., Kukutla, P., Yan, G., Xu, J., 2011. Dynamic Gut Microbiome across Life History of the Malaria Mosquito *Anopheles gambiae* in Kenya. *PLOS One* 6, e24767.

Wells, T.N.C., van Huijsduijnen, R.H., Van Voorhis, W.C., 2015. Malaria medicines: a glass half full? *Nat. Rev. Drug Discov.* 14, 424–442.

Whitty, C.J.M., Ansah, E., 2019. Malaria control stalls in high incidence areas. *BMJ* 365.

Zarei, M., Aminzadeh, S., Zolgharnein, H., Safahieh, A., Daliri, M., Noghabi, K.A., Ghoroghi, A., Motallebi, A., 2011. Characterization of a chitinase with antifungal activity from a native *Serratia marcescens* B4A. *Braz. J. Microbiol.* 42, 1017–1029.

Zhang, X., Zhang, J., Zhu, K.Y., 2010. Chitosan/double-stranded RNA nanoparticle-mediated RNA interference to silence chitin synthase genes through larval feeding in the African malaria mosquito (*Anopheles gambiae*). *Insect Mol. Biol.* 19, 683–693.

Zhao, D., Guo, W., Sun, W., Xu, D., Liu, D., 2011. Identification of a novel enhancin-like gene from *Bacillus thuringiensis*. *Front. Agric. China* 5, 423–429.

Zhong, W., Ding, S., Guo, H., Zhong, W., Ding, S., Guo, H., 2015. The chitinase C gene PsChiC from *Pseudomonas* sp. and its synergistic effects on larvicidal activity. *Genet Mol Biol.* 38, 366–372.

Zhou, W., Li, J., Chen, J., Liu, X., Xiang, T., Zhang, L., Wan, Y., 2016. The red pigment prodigiosin is not an essential virulence factor in entomopathogenic *Serratia marcescens*. *J. Invertebr. Pathol.* 136, 92–94.
